# Supplementary material for: Electrochemical reactions of lithium–sulfur batteries: an analytical study using the organic conversion technique
Source: Royal Society of Chemistry journal article supplement (doi:10.1039/c4cp00958d), 2014-01-01
Supplement: c4cp00958d1.pdf [file c4cp00958d1.pdf]

## Supporting Information

### Electrochemical reactions of lithium-sulfur batteries: an analytical study using the organic conversion technique

Ayako Kawase<sup>1\*</sup>, Soichi Shirai<sup>2</sup>, Yoshinari Yamoto<sup>3</sup>, Ryuichi Arakawa<sup>3</sup> and Toshikazu Takata<sup>4</sup>

<sup>1</sup>Daihatsu Motor Co., Ltd., R&D Division, Ryuo, Gamo, Shiga 520-2593, Japan

<sup>2</sup>Toyota Central R&D Laboratories, Inc., Inorganic Materials Division, Nagakute, Aichi 480-1192, Japan

<sup>3</sup>Department of Applied Chemistry, Faculty of Chemistry, Materials and Bioengineering, Kansai University, 3-3-35 Yamate-cho, Suita 564-8680, Japan

<sup>4</sup>Department of Organic and Polymeric Materials, Tokyo Institute of Technology, Ookayama, Meguro-ku, Tokyo 152-8550, Japan

#### Contents

- A. Experimental and theoretical mass spectra.
- B. LC/MS results at measuring points during cell charge.
- C. Models for the calculations of <sup>1</sup>H NMR chemical shifts.
- D. UV-Vis spectra at measuring points during cell charge.
- E. Models for the calculations of UV-Vis spectra.
- F. HOMO and LUMO levels of lithium polysulfide species.
- G. Color change as a result of conversion from Li<sub>2</sub>S<sub>x</sub> to Bz<sub>2</sub>S<sub>x</sub>
- H. Conversion behavior of Li<sub>2</sub>S<sub>x</sub> (x= 3 to 8) and instability of long Bz<sub>2</sub>S<sub>x</sub> (x= 6 to 8).
- I. Conversion behavior of Li<sub>2</sub>S to Bz<sub>2</sub>S.

#### Abbreviations used in this Supporting Information

Bz: Benzyl, LC: liquid chromatography, MS: mass spectrometry, NMR: nuclear magnetic resonance spectrometry, UV/Vis: ultraviolet-visible absorption, HOMO: Highest Occupied Molecular Orbital, LUMO: Lowest Unoccupied Molecular Orbital,

## A. Experimental and theoretical mass spectra.

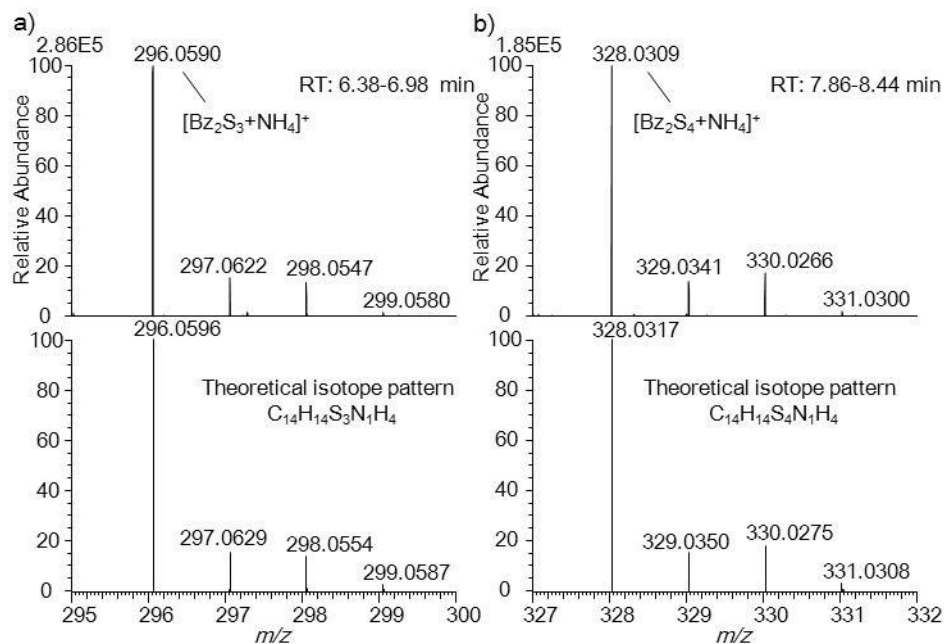

Fig. S1 Experimental mass spectra and the corresponding theoretical isotope patterns for ammonium adducts of benzylized polysulfides (a)  $Bz_2S_3$  and (b)  $Bz_2S_4$ .

## B. LC/MS results at measuring points during cell charge.

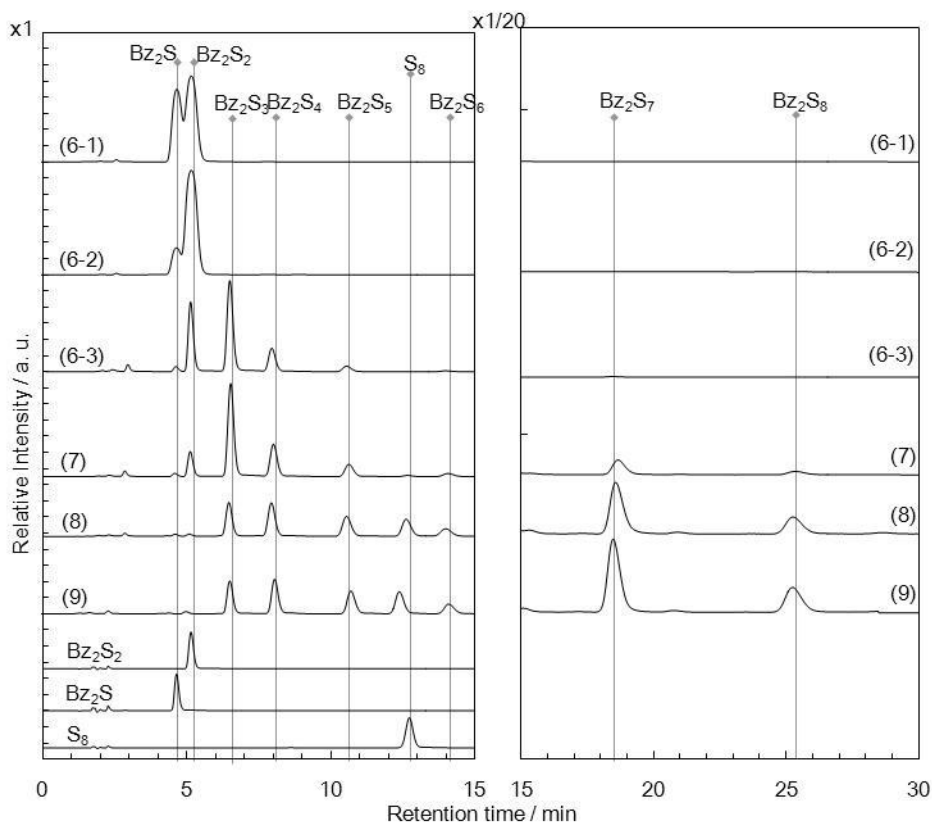

Fig. S2 LC data for points 5 to 9 with  $Bz_2S$ ,  $Bz_2S_2$  and  $S_8$  as references.

### C. Models for the calculations of $^1\text{H}$ NMR chemical shifts.

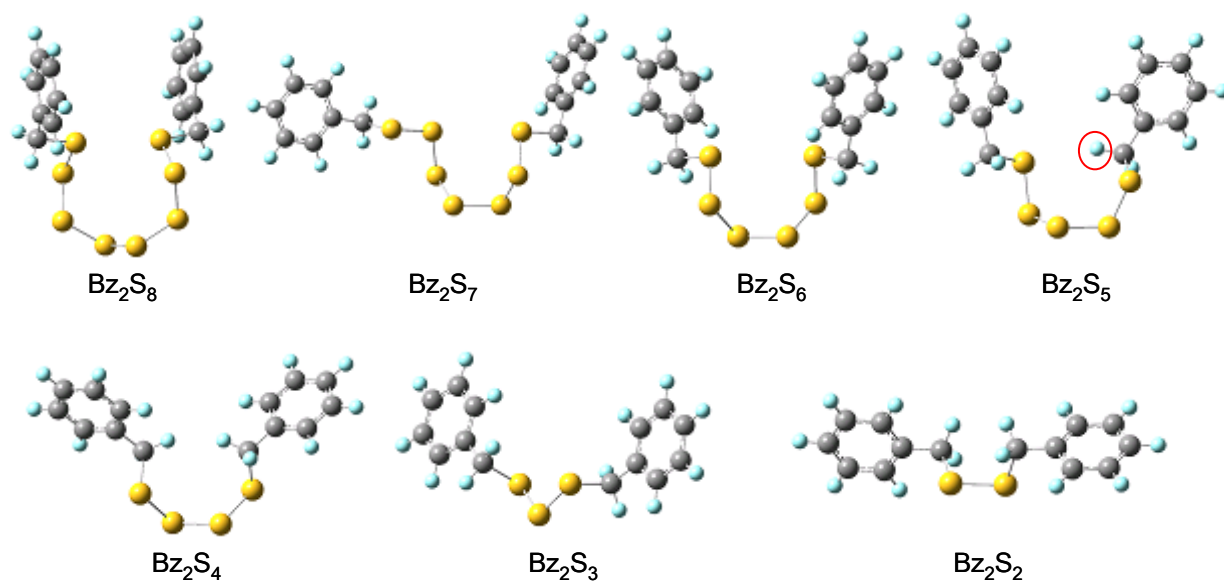

Fig. S3 Benzylized polysulfide models for calculation of  $^1\text{H}$  NMR chemical shifts. (yellow, S; gray, C; and light blue, H) The methylene H in  $\text{Bz}_2\text{S}_5$  circled in red is located close to the fifth S atom, resulting in a hydrogen-bond-like interaction.

### D. UV-Vis spectra at measuring points during cell charge.

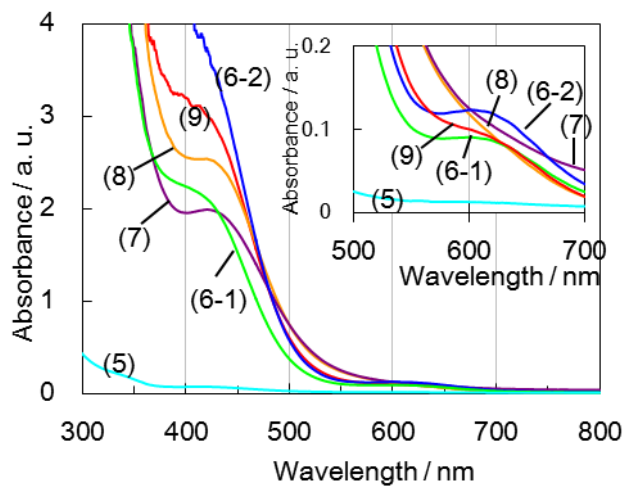

Fig. S4 Variations in UV-Vis spectra of electrolyte solutions over the charging process. Measuring points are shown in Fig. 1 of the text.

## E. Models for the calculations of UV-Vis spectra.

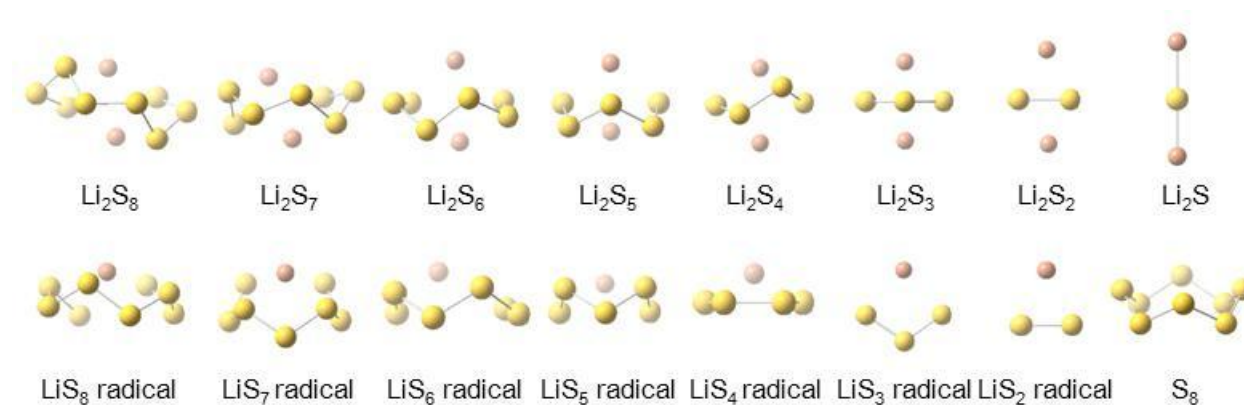

Fig. S5 Lithium-polysulfide, lithium-polysulfide radical and sulfur models for the calculations of UV-Vis spectra (yellow, S; and red, Li).

## F. HOMO and LUMO levels of lithium polysulfide species.

Table S1. HOMO and LUMO levels, and the HOMO-LUMO gap ( $\Delta$ HOMO-LUMO) of  $\text{Li}_2\text{S}_x$ ,  $\text{LiS}_x$  radicals and  $\text{S}_8$ .

| Closed-shell species    |                       |                         |                         |                         |                         |                         |                         |                         |              |
|-------------------------|-----------------------|-------------------------|-------------------------|-------------------------|-------------------------|-------------------------|-------------------------|-------------------------|--------------|
|                         | $\text{Li}_2\text{S}$ | $\text{Li}_2\text{S}_2$ | $\text{Li}_2\text{S}_3$ | $\text{Li}_2\text{S}_4$ | $\text{Li}_2\text{S}_5$ | $\text{Li}_2\text{S}_6$ | $\text{Li}_2\text{S}_7$ | $\text{Li}_2\text{S}_8$ | $\text{S}_8$ |
| LUMO / eV               | -0.25                 | -0.69                   | -1.13                   | -1.40                   | -2.16                   | -1.90                   | -2.80                   | -2.69                   | -2.75        |
| HOMO / eV               | -4.77                 | -4.66                   | -4.91                   | -5.47                   | -5.78                   | -5.68                   | -6.24                   | -6.02                   | -7.40        |
| $\Delta$ HOMO-LUMO / eV | 4.52                  | 3.97                    | 3.78                    | 4.07                    | 3.63                    | 3.78                    | 3.43                    | 3.34                    | 4.65         |
| Radical species         |                       |                         |                         |                         |                         |                         |                         |                         |              |
|                         | $\text{LiS}_2\cdot$   | $\text{LiS}_3\cdot$     | $\text{LiS}_4\cdot$     | $\text{LiS}_5\cdot$     | $\text{LiS}_6\cdot$     | $\text{LiS}_7\cdot$     | $\text{LiS}_8\cdot$     |                         |              |
| $\beta$ -LUMO / eV      | -3.28                 | -3.52                   | -3.65                   | -4.07                   | -2.26                   | -4.06                   | -3.85                   |                         |              |
| $\beta$ -HOMO / eV      | -5.27                 | -6.32                   | -5.78                   | -5.82                   | -5.70                   | -6.01                   | -6.33                   |                         |              |
| $\Delta$ HOMO-LUMO / eV | 1.99                  | 2.80                    | 2.13                    | 1.75                    | 3.44                    | 1.95                    | 2.48                    |                         |              |

### G. Color change as a result of conversion from $\text{Li}_2\text{S}_x$ to $\text{Bz}_2\text{S}_x$

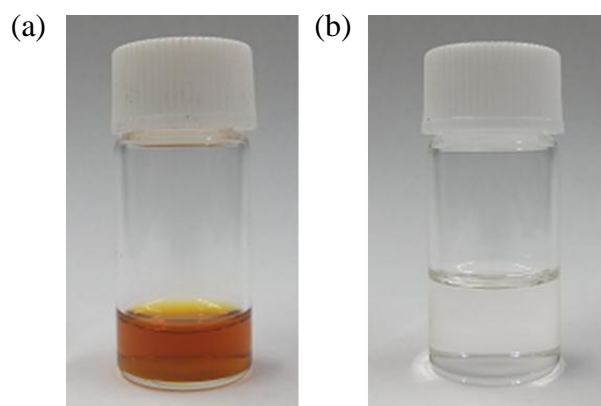

Fig. S6 (a)  $\text{Li}_2\text{S}_x$  ( $x = 3$  to  $8$ ) solution and (b)  $\text{Bz}_2\text{S}_x$  solution. One ml of  $\text{Li}_2\text{S}_x$  solution becomes transparent within one minute of the addition of 1 ml of benzyl chloride, indicating immediate conversion of  $\text{Li}_2\text{S}_x$  to  $\text{Bz}_2\text{S}_x$ . The red color of the  $\text{Li}_2\text{S}_x$  solution well correlates with UV-Vis spectra in Fig. 4 of the text.

### H. Conversion behavior of $\text{Li}_2\text{S}_x$ ( $x = 3$ to $8$ ) and instability of long $\text{Bz}_2\text{S}_x$ ( $x = 6$ to $8$ )

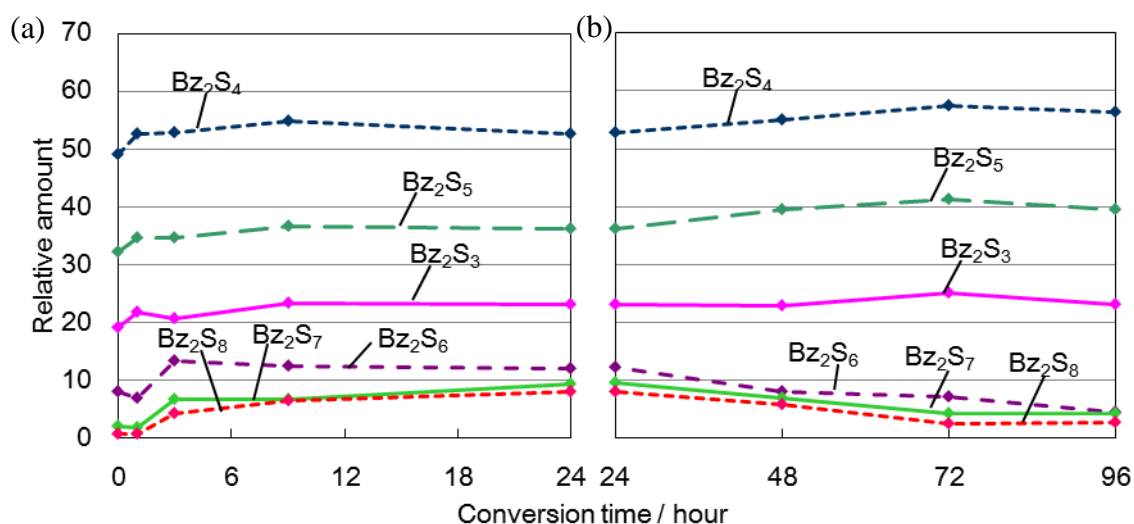

Fig. S7 Relative amounts of  $\text{Bz}_2\text{S}_x$  from  $\text{Li}_2\text{S}_x$  ( $x = 3$  to  $8$ ) against conversion time. The benzyl chloride was added at zero hour.  $\text{Li}_2\text{S}_x$  mixture was prepared by reaction of  $\text{S}_8$  and  $\text{Li}_2\text{S}$  ( $\text{S}_8:\text{Li}_2\text{S} = 7:8$  molar ratio) in DME and filtration. Relative amounts were estimated from LC peak area using the calculated relative absorbance at 254 nm. (a) The conversion of  $\text{Li}_2\text{S}_x$  ( $x = 3$  to  $8$ ) is almost complete within three hours. (b) The longer  $\text{Li}_2\text{S}_i$  ( $i = 6$  to  $8$ ) are split to shorter  $\text{Li}_2\text{S}_j$  ( $j = 3$  to  $5$ ) after 24 hours (one day).

## I. Conversion behavior of $\text{Li}_2\text{S}$ .

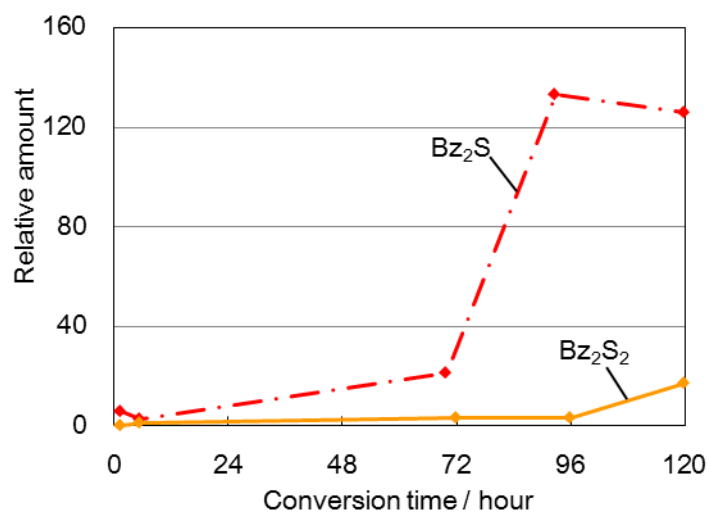

Fig. S8 Relative amounts of  $\text{Bz}_2\text{S}$  and  $\text{Bz}_2\text{S}_2$  converted from  $\text{Li}_2\text{S}$  against conversion time. The benzyl chloride was added at zero hour and the solvent was DME. Relative amounts were estimated from LC peak area, using calibration curves. The  $\text{Bz}_2\text{S}$  maximum is around 96 hours (four days). After the  $\text{Bz}_2\text{S}$  maximum,  $\text{Bz}_2\text{S}_2$  appears, indicating  $\text{Li}_2\text{S}$  coalesces to  $\text{Li}_2\text{S}_2$ .
